# Supplementary material for: Altitude matters: differences in cardiovascular and respiratory responses to hypoxia in bar-headed geese reared at high and low altitudes
Source: Oxford University Press journal article supplement (doi:10.1242/jeb.132431), 2016-07-01
Supplement: jeb132431supp.pdf [file jeb132431supp.pdf]

### Supplementary Figures

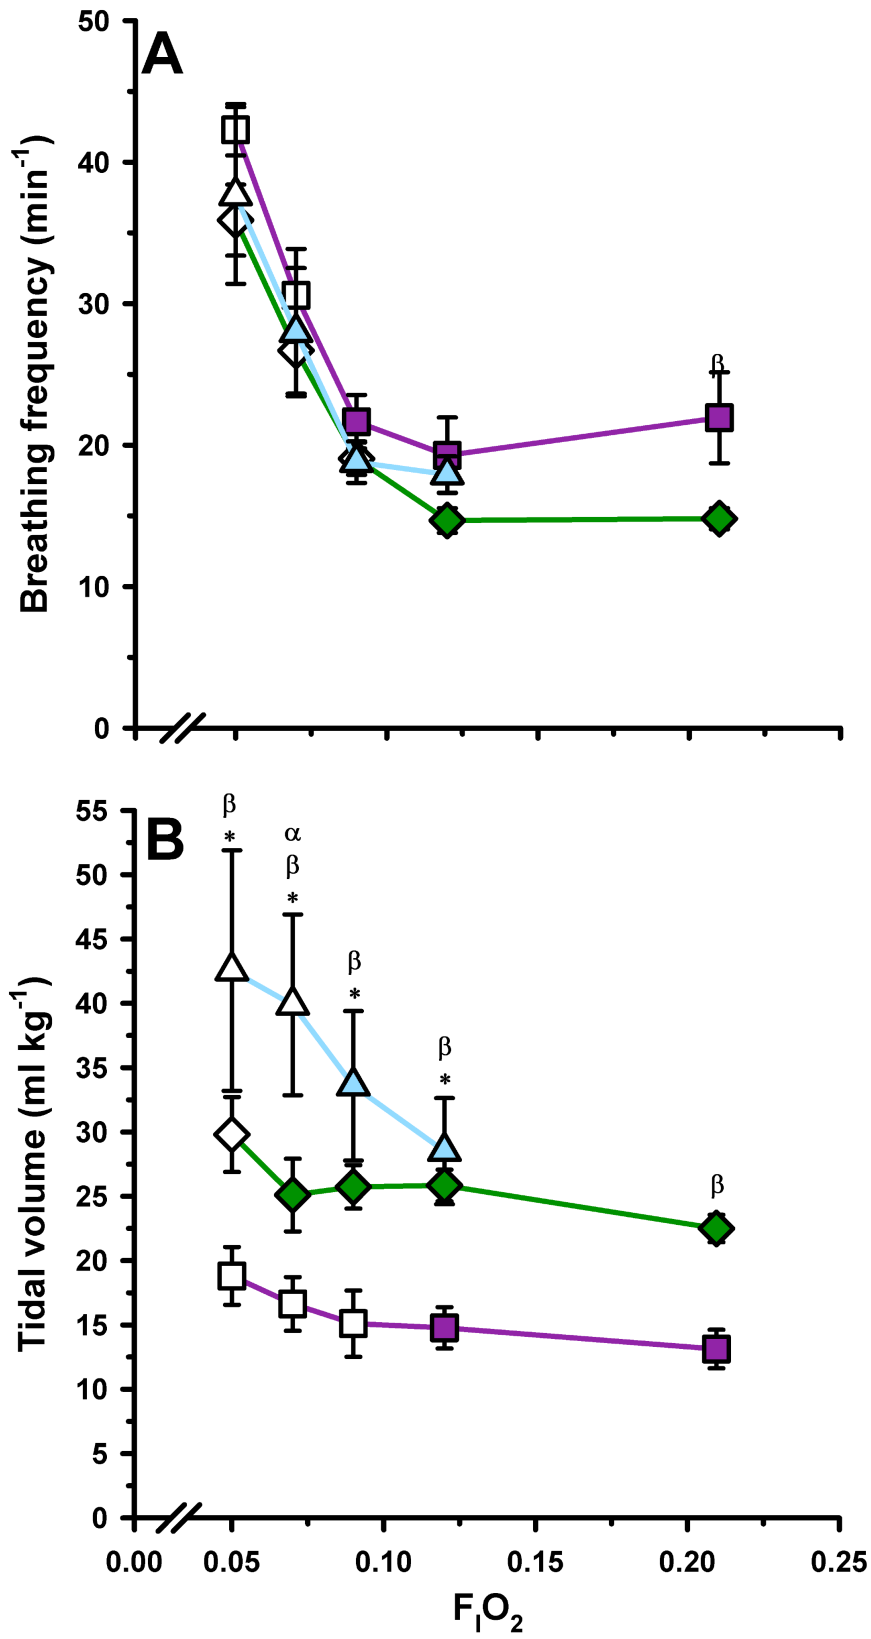

**Supplementary Figure S1: Changes in the components of total ventilation during progressive hypoxic exposure.** (A) Breathing frequency was initially higher in barnacle geese, but increased in all groups throughout hypoxia exposure. (B) Tidal volume (in BTPS) was greater in magnitude in bar-headed geese than barnacle geese, though it increased in all groups. Values represent means  $\pm$  s.e.m (blue triangle: high-altitude-reared bar-headed geese, N=5; green diamond: low-altitude-reared bar-headed geese, N=5; purple square: barnacle geese, N=7). ). Significant differences ( $P < 0.05$ ) from values obtained with ambient exposure within a species are indicated by open symbols and determined by one-way repeated measured ANOVA. Significant differences ( $P < 0.05$ ) between species are determined by two-way repeated measures ANOVA and indicated by different symbols: \*high-altitude-reared bar-headed geese versus barnacle geese, <sup>a</sup>high-altitude-reared bar-headed geese versus low-altitude-reared bar-headed geese, and <sup>b</sup>low-altitude-reared bar-headed geese versus barnacle geese.

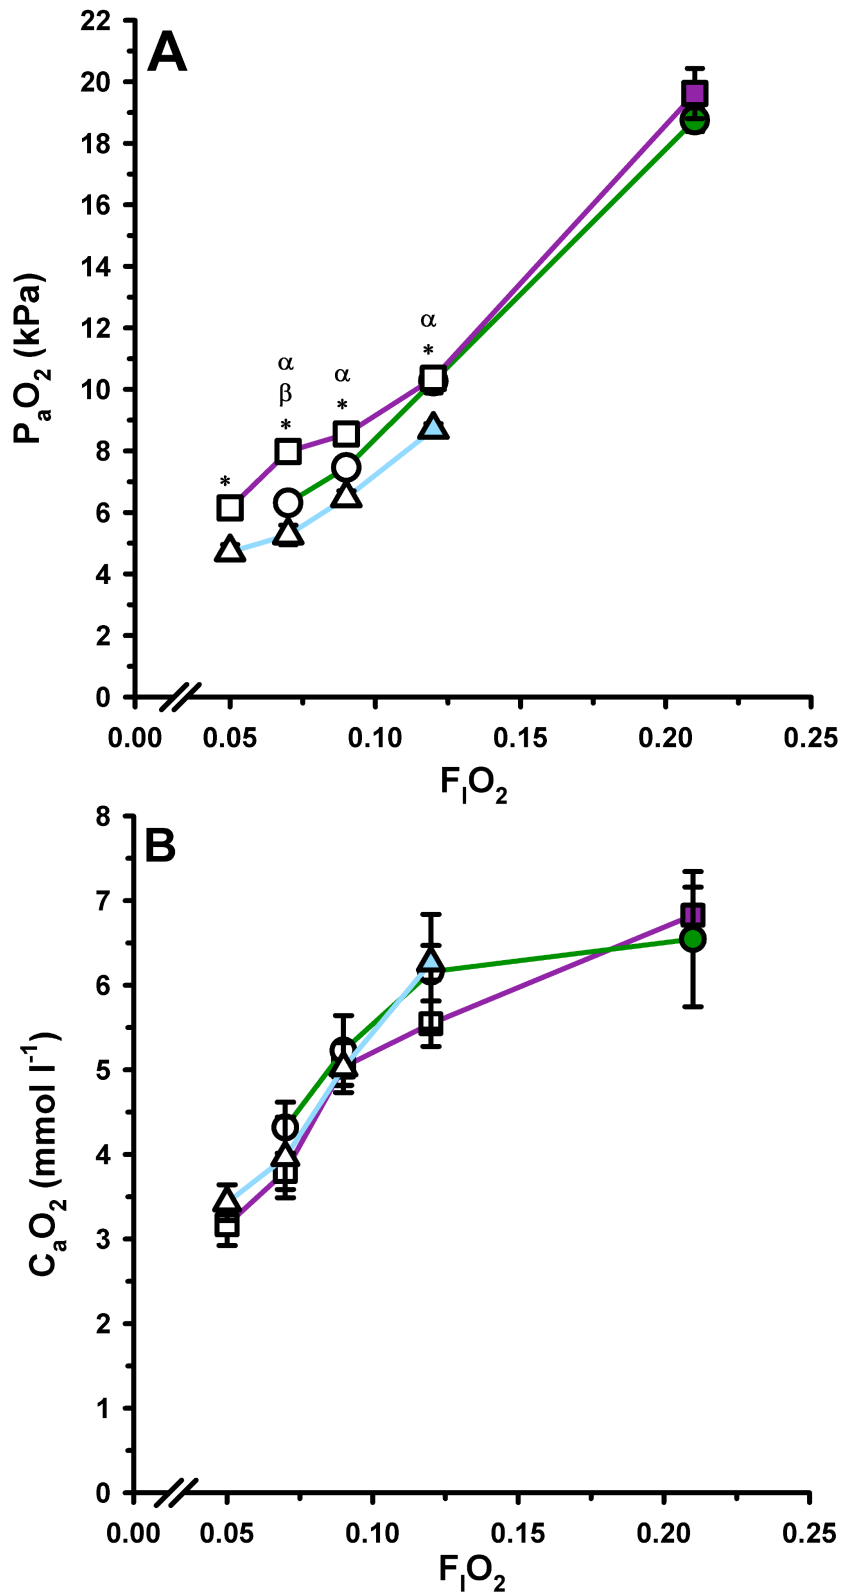

**Supplementary Figure S2: The relationship of arterial partial pressure of oxygen and arterial oxygen content with inspired oxygen level throughout hypoxic exposure.**

(A) Arterial partial pressure of oxygen ( $P_aO_2$ ) decreased with decreasing fractional oxygen composition of inspired gas ( $F_I O_2$ ) in all groups, though high-altitude-reared bar-headed geese had a lower  $P_aO_2$  at any given  $F_I O_2$  than either low-altitude-reared group. Significant differences ( $P < 0.05$ ) in  $P_aO_2$  between species are indicated by different symbols: \*high-altitude-reared bar-headed geese versus barnacle geese, <sup>a</sup>high-altitude-reared bar-headed geese versus low-altitude-reared bar-headed geese, and <sup>β</sup>low-altitude-reared bar-headed geese versus barnacle geese. (B) Arterial oxygen content ( $C_aO_2$ ) decreased with decreasing  $F_I O_2$ . Values are means  $\pm$  s.e.m (blue triangle: high-altitude-reared bar-headed geese, N=5; green diamond: low-altitude-reared bar-headed geese, N=6; purple square: barnacle geese, N=7). Significant differences ( $P < 0.05$ ) from ambient exposure performance within a species are indicated by open symbols and determined by one-way repeated measured ANOVA.

**Barnacle geese (0 m)**

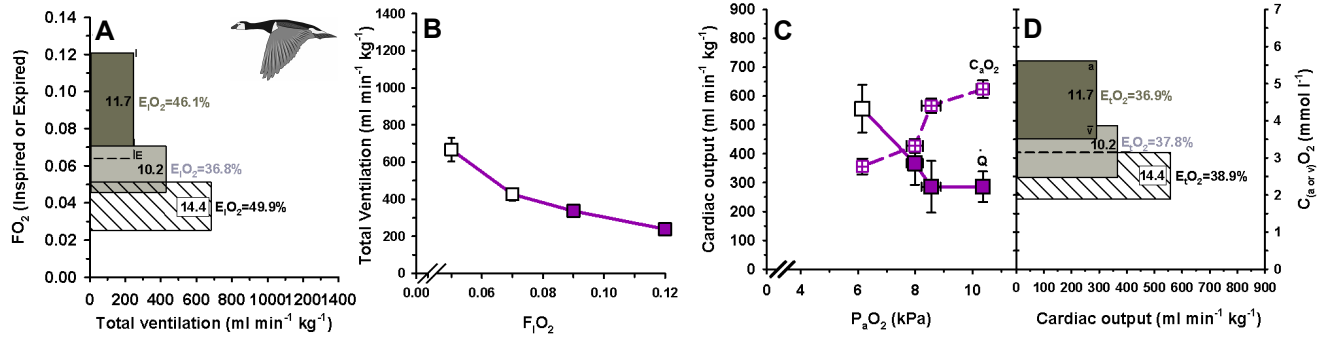

**Bar-headed geese (0 m)**

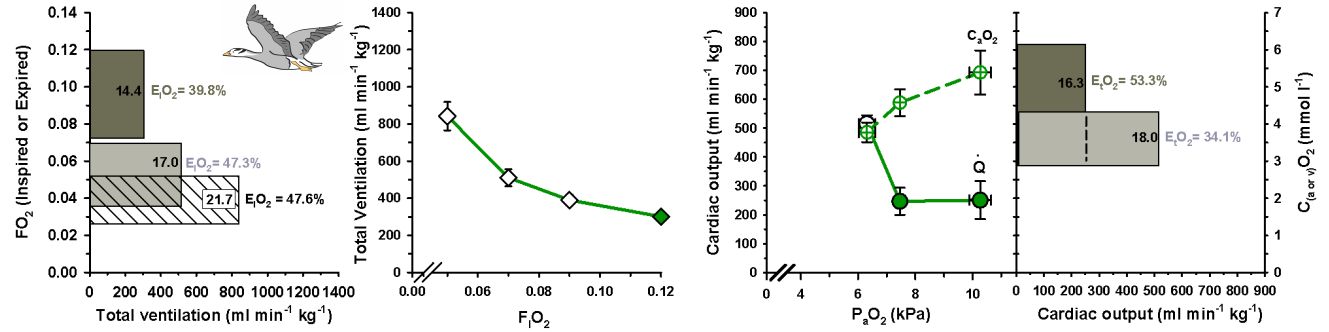

**Bar-headed geese (3200 m)**

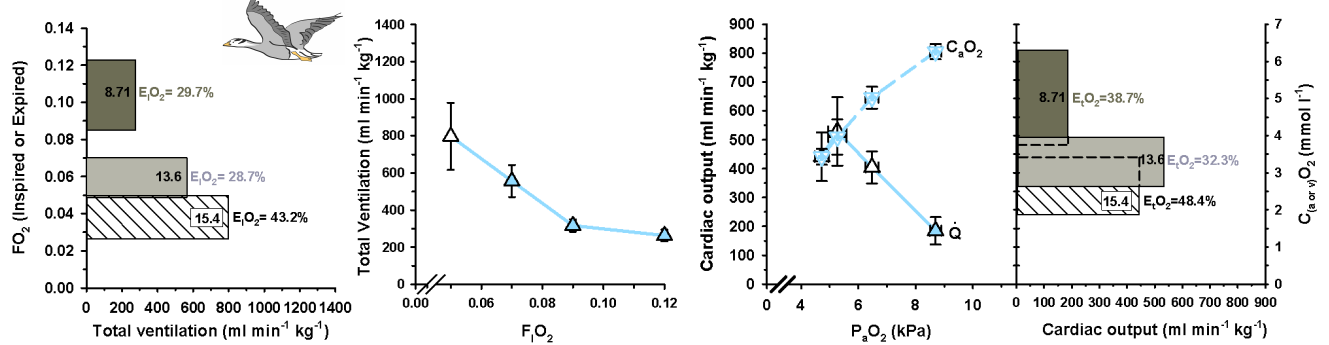

**Supplementary Figure S3: A summary of the trends in the hypoxic ventilatory response and hypoxic cardiovascular response of bar-headed geese and barnacle geese.** Graphs summarizing the hypoxic ventilatory responses and cardiovascular responses of barnacle geese (N=7), low-altitude-reared bar-headed geese (N=5), and high-altitude-reared bar-headed geese (N=5). The Y axis of the graphs in column A is the fractional composition of oxygen ( $F_{I}O_2$ ). The top of each box is the inspired  $F_{I}O_2$  while the bottom of each box is the expired  $F_{I}O_2$ . The difference between these two represents the amount of  $O_2$  extracted from the respired gas ( $E_{I}O_2$ ; %), while the number inside the box represents the area of box, which is equal to the oxygen consumption in  $ml\ O_2\ min^{-1}\ kg^{-1}$  ( $\dot{V}_R \times F_{I}O_2 \times E_{I}O_2$ ). The shading of the boxes depicts different  $F_{I}O_2$  levels: dark grey = 0.12, light grey = 0.07, and striped = 0.05  $F_{I}O_2$ . The graphs in column B illustrate how total ventilation (in STPD) increased in each species with decreasing  $F_{I}O_2$ . The graphs in column C depict the relationship between cardiac output ( $\dot{Q}$ ; solid symbols, left axis) and arterial oxygen content ( $C_aO_2$ ; hatched symbols, right axis of column D) with arterial partial pressure of oxygen ( $P_aO_2$ ) in each species. The Y axis of the graphs in column D is the  $C_aO_2$ . The top of each box is the  $C_aO_2$ , while the bottom of each box is the venous oxygen content ( $C_vO_2$ ). The difference between these two represents the amount of  $O_2$  extracted from the blood by the tissues ( $E_tO_2$ ; %), while the number inside the box represents the area of box, which is equal to the oxygen consumption in  $ml\ O_2\ min^{-1}\ kg^{-1}$  ( $\dot{Q} \times C_aO_2 \times E_tO_2$ ). The shading of the boxes depicts different  $F_{I}O_2$  levels: dark grey = 0.12, light grey = 0.07, and striped = 0.05  $F_{I}O_2$ . Significant differences ( $P < 0.05$ ) in values from those obtained at ambient exposure for  $\dot{V}_R$  and  $\dot{Q}$  within a species are indicated by open symbols in the graphs in columns B and C and determined by one-way repeated measured ANOVA.
